# Supplementary material for: Naturally fractured reservoir characterization in heterogeneous sandstones: insight for Uranium In Situ Recovery (Imouraren, Niger)
Source: Copernicus journal article supplement (doi:10.5194/egusphere-2024-435), 2024-02-15
Supplement: Supplementary file 1 [file egusphere-2024-435-supplement.zip]

Archive with 3 entries (3 files):
- Supplement/SupMat2_1.pdf
- Supplement/SupMat2_2.pdf
- Supplement/SupMat3.pdf
