# Supplementary material for: Naturally fractured reservoir characterization in heterogeneous sandstones: insight for Uranium In Situ Recovery (Imouraren, Niger)
Source: Copernicus journal article supplement (doi:10.5194/egusphere-2024-435), 2024-02-15
Supplement: Supplementary file 1 [file egusphere-2024-435-supplement.zip › Supplement/SupMat2_1.pdf]

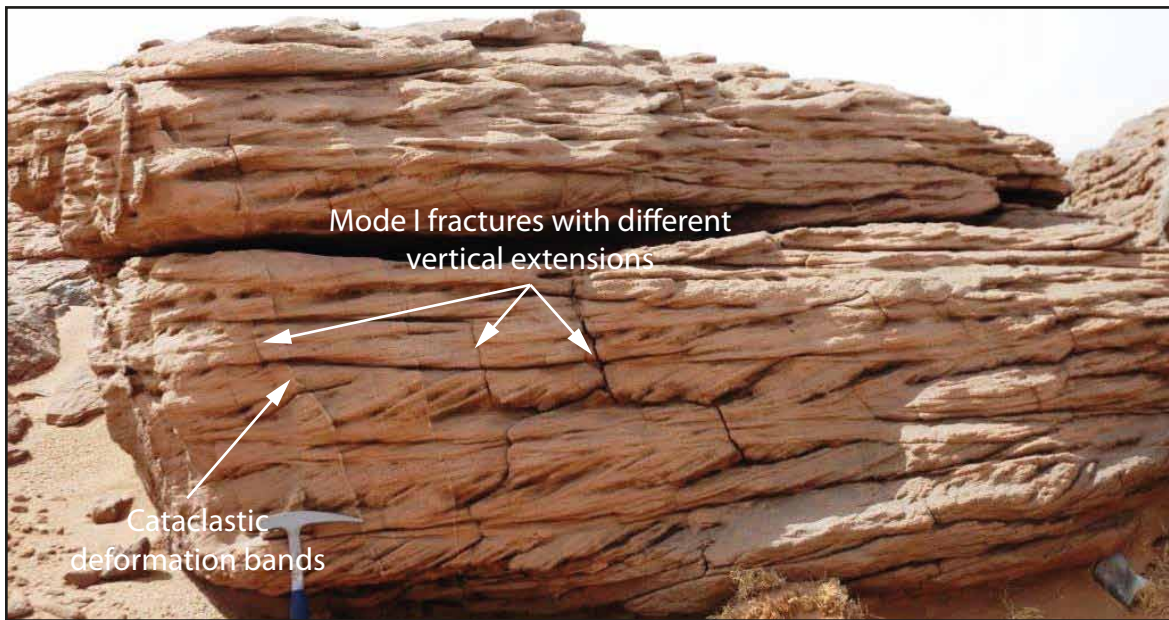

Photo of the Tchirezrine II outcrop showing cataclastic deformation bands and Mode I fractures present in the same sandstone unit. Note that the mechano-stratigraphic impact the vertical extension of the Mode I fractures.

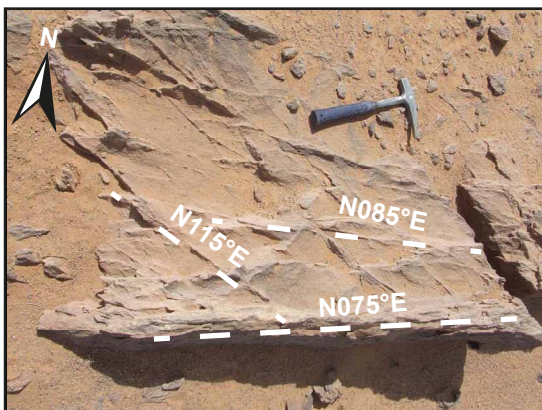

Photo of the Tchirezrine II outcrop showing cataclastic deformation bands system, next to a regional N070°E-N080°E cluster of faults

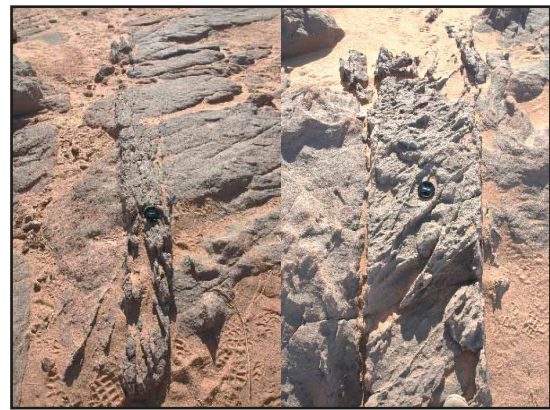

Photo of the Tchirezrine II outcrop showing faults made of cataclastic deformation bands clusters near the DASA site

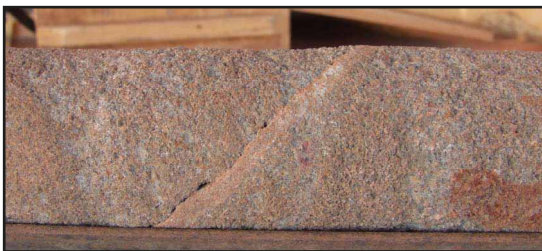

Cataclastic deformation bands with one open side from Tchirezrine II unit at Imouraren site.

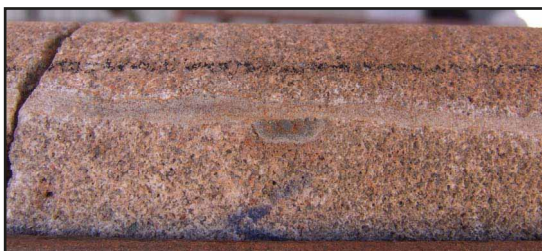

Cataclastic deformation bands crosscutting a clayey pebble from Tchirezrine II unit at Imouraren site.

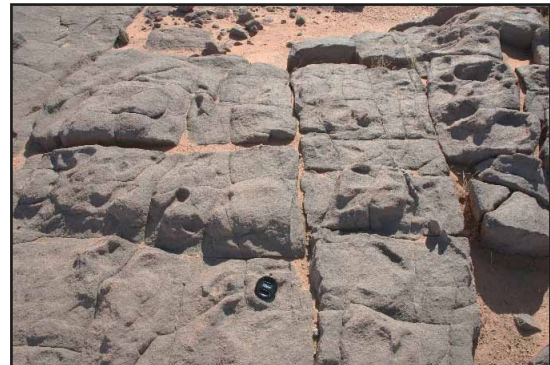

Photo of the Tchirezrine II outcrop showing orthogonal joint sets near the DASA site

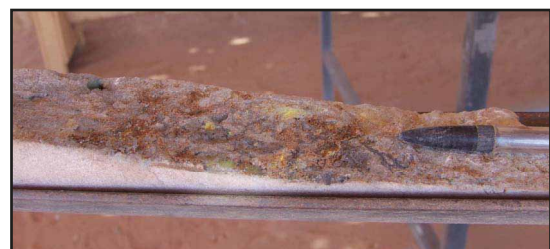

Open joint with some uranum oxydes from Tchirezrine II unit at Imouraren site.
