# Supplementary material for: Naturally fractured reservoir characterization in heterogeneous sandstones: insight for Uranium In Situ Recovery (Imouraren, Niger)
Source: Copernicus journal article supplement (doi:10.5194/egusphere-2024-435), 2024-02-15
Supplement: Supplementary file 1 [file egusphere-2024-435-supplement.zip › Supplement/SupMat2_2.pdf]

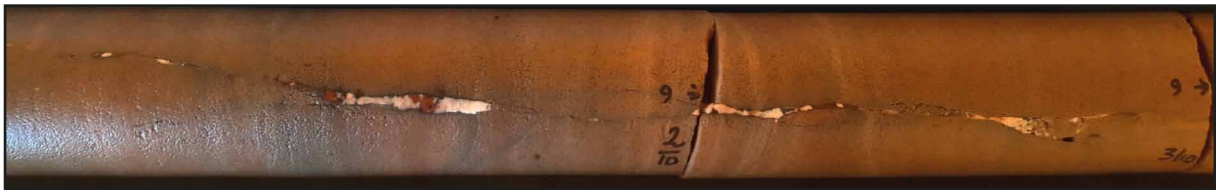

Mode I fracture with calcite seal in fine sandstone from Tchirezrine II unit at Imouraren site

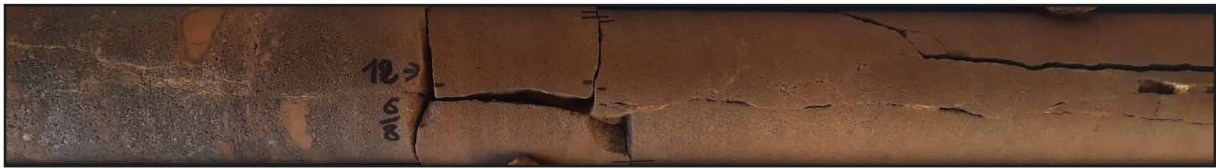

Structure vertical change as fonction of lithology, from cataclastic deformation band in very coarse sandstone to Mode I fracture in fine-medium sandstone from Tchirezrine II unit at Imouraren site

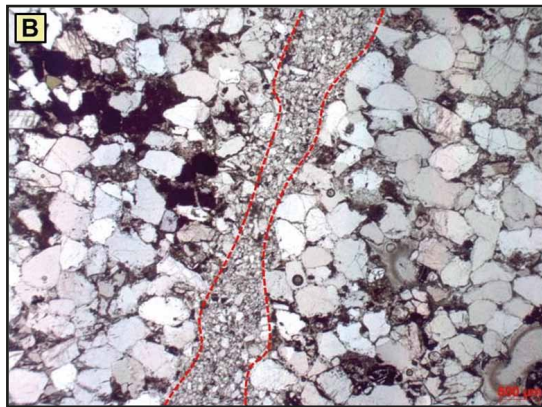

Thin section showing a cataclastic deformation band with trans-granular fracturing from Tchirezrine II unit at Imouraren site. From Mamane Mamadou (2016)
