# Supplementary figures and images for: Naturally fractured reservoir characterization in heterogeneous sandstones: insight for Uranium In Situ Recovery (Imouraren, Niger)
Source: Copernicus journal article supplement (doi:10.5194/egusphere-2024-435), 2024-02-15

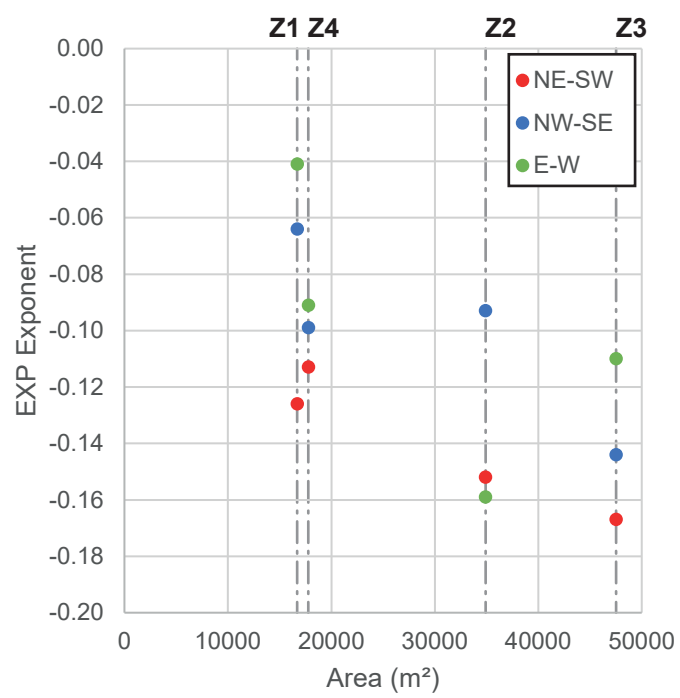

Supplement: Supplementary file 1 [file egusphere-2024-435-supplement.zip › Supplement/SupMat3.pdf]
